# Supplementary material for: Mathematical Characterization of Protein Sequences Using Patterns as Chemical Group Combinations of Amino Acids
Source: PubMed Central journal article supplement (PMC5145171; doi:10.1371/journal.pone.0167651), 2016-12-08
Supplement: pone.0167651.s001.pdf [file pone.0167651.s001.pdf]

S1 Table. Chemical group transitions or ordered pairs count of every individual sequence of myosin II fourteen members.

| Seq. No-1  |    |    |    |     |    |    |    |    | Seq. No-2  |    |    |    |     |    |    |    |    |
|------------|----|----|----|-----|----|----|----|----|------------|----|----|----|-----|----|----|----|----|
| G1         | G2 | G3 | G4 | G5  | G6 | G7 | G8 |    | G1         | G2 | G3 | G4 | G5  | G6 | G7 | G8 |    |
| G1         | 12 | 16 | 10 | 34  | 5  | 4  | 6  | 15 | G1         | 17 | 23 | 9  | 29  | 2  | 5  | 6  | 15 |
| G2         | 18 | 15 | 11 | 52  | 6  | 5  | 8  | 14 | G2         | 17 | 15 | 10 | 46  | 4  | 5  | 15 | 17 |
| G3         | 6  | 14 | 5  | 24  | 2  | 2  | 13 | 10 | G3         | 7  | 13 | 6  | 29  | 2  | 3  | 11 | 10 |
| G4         | 41 | 44 | 28 | 119 | 16 | 9  | 24 | 30 | G4         | 39 | 39 | 33 | 99  | 7  | 15 | 26 | 32 |
| G5         | 2  | 14 | 3  | 13  | 5  | 2  | 4  | 5  | G5         | 1  | 7  | 1  | 7   | 3  | 1  | 2  | 5  |
| G6         | 3  | 3  | 4  | 13  | 1  | 0  | 4  | 3  | G6         | 2  | 5  | 5  | 17  | 2  | 1  | 4  | 2  |
| G7         | 9  | 11 | 10 | 23  | 7  | 6  | 7  | 4  | G7         | 14 | 15 | 8  | 28  | 3  | 4  | 9  | 2  |
| G8         | 11 | 12 | 5  | 33  | 7  | 2  | 11 | 4  | G8         | 9  | 12 | 9  | 35  | 5  | 3  | 10 | 5  |
| Seq. No-3  |    |    |    |     |    |    |    |    | Seq. No-4  |    |    |    |     |    |    |    |    |
| G1         | G2 | G3 | G4 | G5  | G6 | G7 | G8 |    | G1         | G2 | G3 | G4 | G5  | G6 | G7 | G8 |    |
| G1         | 15 | 22 | 11 | 27  | 4  | 5  | 6  | 16 | G1         | 14 | 25 | 11 | 27  | 4  | 4  | 7  | 15 |
| G2         | 17 | 14 | 12 | 50  | 4  | 4  | 13 | 18 | G2         | 18 | 17 | 12 | 54  | 3  | 5  | 12 | 17 |
| G3         | 7  | 16 | 6  | 30  | 2  | 3  | 8  | 9  | G3         | 7  | 16 | 6  | 29  | 2  | 3  | 10 | 11 |
| G4         | 40 | 40 | 29 | 106 | 8  | 14 | 23 | 30 | G4         | 41 | 40 | 32 | 94  | 7  | 16 | 26 | 29 |
| G5         | 2  | 8  | 2  | 9   | 3  | 1  | 1  | 4  | G5         | 2  | 7  | 1  | 9   | 3  | 1  | 1  | 5  |
| G6         | 3  | 5  | 6  | 14  | 2  | 2  | 2  | 4  | G6         | 5  | 5  | 4  | 16  | 2  | 1  | 2  | 3  |
| G7         | 12 | 14 | 7  | 20  | 2  | 5  | 3  | 4  | G7         | 10 | 15 | 9  | 23  | 2  | 5  | 4  | 4  |
| G8         | 10 | 13 | 8  | 34  | 6  | 3  | 11 | 6  | G8         | 10 | 13 | 9  | 33  | 7  | 2  | 10 | 5  |
| Seq. No-5  |    |    |    |     |    |    |    |    | Seq. No-6  |    |    |    |     |    |    |    |    |
| G1         | G2 | G3 | G4 | G5  | G6 | G7 | G8 |    | G1         | G2 | G3 | G4 | G5  | G6 | G7 | G8 |    |
| G1         | 15 | 14 | 7  | 40  | 1  | 4  | 9  | 13 | G1         | 11 | 13 | 8  | 34  | 2  | 5  | 10 | 16 |
| G2         | 12 | 19 | 19 | 40  | 6  | 8  | 14 | 9  | G2         | 10 | 16 | 17 | 48  | 5  | 5  | 15 | 13 |
| G3         | 7  | 15 | 9  | 33  | 4  | 7  | 5  | 12 | G3         | 10 | 13 | 6  | 29  | 2  | 5  | 9  | 14 |
| G4         | 46 | 36 | 29 | 99  | 8  | 14 | 35 | 31 | G4         | 38 | 45 | 30 | 106 | 11 | 11 | 30 | 21 |
| G5         | 4  | 8  | 5  | 2   | 2  | 1  | 1  | 2  | G5         | 4  | 8  | 4  | 8   | 3  | 2  | 2  | 3  |
| G6         | 2  | 6  | 6  | 21  | 0  | 1  | 3  | 3  | G6         | 5  | 5  | 3  | 12  | 0  | 3  | 5  | 4  |
| G7         | 10 | 14 | 5  | 38  | 0  | 4  | 7  | 4  | G7         | 9  | 13 | 9  | 34  | 3  | 3  | 3  | 7  |
| G8         | 7  | 15 | 12 | 25  | 5  | 2  | 8  | 6  | G8         | 12 | 16 | 11 | 21  | 9  | 2  | 7  | 6  |
| Seq. No-7  |    |    |    |     |    |    |    |    | Seq. No-8  |    |    |    |     |    |    |    |    |
| G1         | G2 | G3 | G4 | G5  | G6 | G7 | G8 |    | G1         | G2 | G3 | G4 | G5  | G6 | G7 | G8 |    |
| G1         | 13 | 19 | 9  | 31  | 4  | 4  | 10 | 12 | G1         | 13 | 19 | 10 | 28  | 5  | 5  | 11 | 11 |
| G2         | 15 | 16 | 14 | 46  | 7  | 6  | 16 | 10 | G2         | 15 | 17 | 14 | 43  | 8  | 6  | 16 | 10 |
| G3         | 7  | 14 | 6  | 29  | 6  | 7  | 8  | 12 | G3         | 8  | 14 | 6  | 30  | 4  | 7  | 9  | 13 |
| G4         | 42 | 41 | 33 | 98  | 5  | 11 | 35 | 25 | G4         | 40 | 37 | 36 | 92  | 6  | 13 | 35 | 22 |
| G5         | 4  | 8  | 6  | 5   | 2  | 2  | 1  | 1  | G5         | 5  | 8  | 5  | 7   | 2  | 1  | 2  | 1  |
| G6         | 2  | 6  | 4  | 13  | 0  | 2  | 3  | 3  | G6         | 3  | 8  | 4  | 13  | 0  | 3  | 3  | 4  |
| G7         | 10 | 13 | 8  | 42  | 1  | 0  | 10 | 9  | G7         | 10 | 14 | 7  | 44  | 1  | 1  | 8  | 8  |
| G8         | 9  | 13 | 9  | 26  | 5  | 0  | 10 | 5  | G8         | 8  | 12 | 9  | 24  | 6  | 1  | 9  | 7  |
| Seq. No-9  |    |    |    |     |    |    |    |    | Seq. No-10 |    |    |    |     |    |    |    |    |
| G1         | G2 | G3 | G4 | G5  | G6 | G7 | G8 |    | G1         | G2 | G3 | G4 | G5  | G6 | G7 | G8 |    |
| G1         | 13 | 18 | 9  | 29  | 4  | 5  | 11 | 11 | G1         | 13 | 19 | 9  | 29  | 4  | 5  | 11 | 11 |
| G2         | 15 | 16 | 14 | 45  | 7  | 6  | 16 | 10 | G2         | 15 | 16 | 14 | 44  | 8  | 6  | 15 | 10 |
| G3         | 7  | 14 | 6  | 30  | 5  | 7  | 9  | 13 | G3         | 7  | 13 | 6  | 30  | 5  | 7  | 8  | 14 |
| G4         | 41 | 37 | 35 | 88  | 6  | 13 | 36 | 24 | G4         | 41 | 38 | 35 | 93  | 6  | 13 | 35 | 22 |
| G5         | 5  | 8  | 5  | 6   | 2  | 1  | 2  | 1  | G5         | 4  | 8  | 5  | 6   | 2  | 2  | 2  | 1  |
| G6         | 2  | 8  | 4  | 13  | 0  | 2  | 3  | 4  | G6         | 2  | 7  | 4  | 14  | 0  | 3  | 4  | 4  |
| G7         | 9  | 14 | 9  | 45  | 2  | 0  | 12 | 7  | G7         | 11 | 14 | 8  | 41  | 1  | 0  | 10 | 8  |
| G8         | 8  | 14 | 9  | 24  | 5  | 1  | 9  | 6  | G8         | 8  | 13 | 9  | 26  | 5  | 1  | 8  | 8  |
| Seq. No-11 |    |    |    |     |    |    |    |    | Seq. No-12 |    |    |    |     |    |    |    |    |
| G1         | G2 | G3 | G4 | G5  | G6 | G7 | G8 |    | G1         | G2 | G3 | G4 | G5  | G6 | G7 | G8 |    |
| G1         | 14 | 17 | 10 | 30  | 3  | 4  | 14 | 11 | G1         | 12 | 21 | 10 | 23  | 3  | 6  | 13 | 14 |
| G2         | 11 | 18 | 15 | 50  | 6  | 5  | 20 | 9  | G2         | 14 | 17 | 15 | 43  | 9  | 7  | 10 | 11 |
| G3         | 7  | 13 | 5  | 30  | 5  | 8  | 10 | 12 | G3         | 8  | 15 | 6  | 31  | 5  | 7  | 8  | 11 |
| G4         | 42 | 39 | 31 | 87  | 6  | 14 | 34 | 21 | G4         | 41 | 31 | 31 | 92  | 5  | 17 | 31 | 24 |
| G5         | 6  | 7  | 6  | 5   | 2  | 1  | 0  | 2  | G5         | 5  | 7  | 6  | 7   | 2  | 2  | 1  | 1  |
| G6         | 4  | 8  | 4  | 13  | 0  | 1  | 2  | 3  | G6         | 3  | 7  | 5  | 15  | 1  | 4  | 5  | 5  |
| G7         | 10 | 15 | 11 | 39  | 2  | 0  | 11 | 10 | G7         | 10 | 15 | 8  | 34  | 1  | 0  | 11 | 10 |
| G8         | 9  | 17 | 8  | 20  | 6  | 1  | 7  | 7  | G8         | 9  | 13 | 10 | 27  | 6  | 1  | 10 | 9  |
| Seq. No-13 |    |    |    |     |    |    |    |    | Seq. No-14 |    |    |    |     |    |    |    |    |
| G1         | G2 | G3 | G4 | G5  | G6 | G7 | G8 |    | G1         | G2 | G3 | G4 | G5  | G6 | G7 | G8 |    |
| G1         | 14 | 19 | 12 | 25  | 3  | 6  | 10 | 13 | G1         | 15 | 20 | 11 | 25  | 3  | 6  | 10 | 13 |
| G2         | 15 | 15 | 13 | 50  | 8  | 5  | 13 | 12 | G2         | 14 | 16 | 13 | 50  | 7  | 5  | 13 | 13 |
| G3         | 9  | 13 | 6  | 32  | 3  | 6  | 8  | 12 | G3         | 9  | 13 | 7  | 29  | 3  | 6  | 9  | 13 |
| G4         | 38 | 43 | 29 | 98  | 7  | 14 | 30 | 26 | G4         | 39 | 41 | 29 | 94  | 6  | 15 | 32 | 28 |
| G5         | 6  | 7  | 5  | 9   | 2  | 1  | 0  | 2  | G5         | 4  | 7  | 4  | 7   | 2  | 1  | 0  | 2  |
| G6         | 3  | 7  | 4  | 16  | 0  | 1  | 3  | 2  | G6         | 2  | 8  | 4  | 16  | 0  | 1  | 4  | 2  |
| G7         | 10 | 16 | 8  | 31  | 3  | 1  | 8  | 5  | G7         | 13 | 14 | 8  | 35  | 0  | 0  | 7  | 6  |
| G8         | 7  | 11 | 12 | 24  | 7  | 1  | 10 | 8  | G8         | 7  | 12 | 13 | 28  | 7  | 2  | 8  | 8  |
