# Supplementary material for: Mathematical Characterization of Protein Sequences Using Patterns as Chemical Group Combinations of Amino Acids
Source: PubMed Central journal article supplement (PMC5145171; doi:10.1371/journal.pone.0167651), 2016-12-08
Supplement: pone.0167651.s002.pdf [file pone.0167651.s002.pdf]

**S2 Table. Various patterns of length 5 aa (from Table 13) and their corresponding amino acid sequences.**

| Seq. Nos.     | Pattern of Length=5 |                  |            |                  |                  |            |                  |                  |
|---------------|---------------------|------------------|------------|------------------|------------------|------------|------------------|------------------|
|               | 37812               | 52471            | 74281      | 78124            | 35247            | 48532      | 43827            | 64837            |
| 1             | 497-YTNEK           | 561-PKATD        | 253-TVKND  | 498-TNEKL        | 560-FPKAT        | 145-INPYK  | 505-LFNHT        | 494-CINYT        |
| 2             | 478-YTNEK           | 542-PKATD        | 233-TVKND  | 479-TNEKL        | 541-FPKAT        | 125-VNPYK  | 486-LFNHT        | 475-CINYT        |
| 3             | 471-YTNEK           | 535-PKATD        | 226-TVKND  | 472-TNEKL        | 534-FPKAT        | 121-INPYK  | 479-LFNHT        | 468-CINYT        |
| 4             | 478-YTNEK           | 542-PKATD        | 233-TVKND  | 479-TNEKL        | 541-FPKAT        | 125-INPYK  | 486-LFNHT        | 475-CINYT        |
| 5             | 492-FTNEK           | 553-PKATD        | 248-TLRND  | 493-TNEKL        | 552-FPKAT        | 143-INPYK  | 620-VFQKS        | 489-CINFT        |
| 6             | 483-FTNEK           | 544-PKASD        | 238-TLRND  | 484-TNEKL        | 543-FPKAS        | 124-INPYK  | 612-IFQKS        | 480-CINFT        |
| 7             | 483-FTNEK           | 544-PKATD        | 238-TVRND  | 484-TNEKL        | 543-FPKAT        | 126-VNPYK  | 611-LYQKS        | 480-CINFT        |
| 8             | 483-FTNEK           | 544-PKATD        | 238-TVRND  | 484-TNEKL        | 543-FPKAT        | 126-VNPYK  | 611-LYQKS        | 480-CINFT        |
| 9             | 483-FTNEK           | 544-PKATD        | 238-TVRND  | 484-TNEKL        | 543-FPKAT        | 128-VNPYK  | 611-LYQKS        | 480-CINFT        |
| 10            | 483-FTNEK           | 544-PKATD        | 238-TVRND  | 484-TNEKL        | 543-FPKAT        | 126-VNPYK  | 611-LYQKS        | 480-CINFT        |
| 11            | 481-FTNEK           | 542-PKATD        | 236-TVRND  | 482-TNEKL        | 541-FPKAT        | 126-VNPYK  | 609-LYQKS        | 478-CINFT        |
| 12            | 482-FTNEK           | 543-PKATD        | 237-TVRND  | 483-TNEKL        | 542-FPKAT        | 126-VNPYK  | 610-LYQKS        | 479-CINFT        |
| 13            | 480-FTNEK           | 541-PKATD        | 235-TVRND  | 481-TNEKL        | 540-FPKAT        | 125-VNPYK  | 608-LYQKS        | 477-CINFT        |
| 14            | 481-FTNEK           | 542-PKATD        | 236-TVRND  | 482-TNEKL        | 541-FPKAT        | 125-VNPYK  | 609-LYQKS        | 478-CINFT        |
| <b>Domain</b> | <b>After ATP</b>    | <b>After ATP</b> | <b>ATP</b> | <b>After ATP</b> | <b>After ATP</b> | <b>ATP</b> | <b>After ATP</b> | <b>After ATP</b> |
