# Supplementary material for: Mathematical Characterization of Protein Sequences Using Patterns as Chemical Group Combinations of Amino Acids
Source: PubMed Central journal article supplement (PMC5145171; doi:10.1371/journal.pone.0167651), 2016-12-08
Supplement: pone.0167651.s003.pdf [file pone.0167651.s003.pdf]

S3 Table. Common blocks/patterns from MYO1 family members and their similarity among myosin II family members.

| Family        | Seq. Nos. | Patterns with similarity |               |                |               |
|---------------|-----------|--------------------------|---------------|----------------|---------------|
|               |           | Similarity (%)           | 444143431     | Similarity (%) | 344127244     |
| Myosin II     | 1         | 89                       | 475-GILDIAGFE | 100            | 284-YLLEKSRAI |
|               | 2         | 89                       | 456-GILDIAGFE | 100            | 264-YLLEKSRAI |
|               | 3         | 89                       | 449-GILDIAGFE | 100            | 257-YLLEKSRAI |
|               | 4         | 89                       | 456-GILDIAGFE | 100            | 264-YLLEKSRAV |
|               | 5         | 89                       | 470-GILDITGFE | 100            | 279-YLLEKSRVI |
|               | 6         | 89                       | 461-GVLDIAGFE | 100            | 269-YLLEKSRVI |
|               | 7         | 89                       | 461-GVLDIAGFE | 100            | 269-YLLEKSRVV |
|               | 8         | 89                       | 461-GVLDIAGFE | 89             | 269-YLLEKSRVT |
|               | 9         | 89                       | 461-GVLDIAGFE | 89             | 269-YLLEKSRVT |
|               | 10        | 89                       | 461-GVLDIAGFE | 89             | 269-YLLEKSRVT |
|               | 11        | 89                       | 459-GVLDIAGFE | 89             | 267-YLLEKSRVT |
|               | 12        | 89                       | 460-GVLDIAGFE | 89             | 268-YLLEKSRVT |
|               | 13        | 89                       | 458-GVLDIAGFE | 100            | 266-YLLEKSRVI |
|               | 14        | 89                       | 459-GVLDIAGFE | 100            | 267-YLLEKSRVI |
| MYO1          | 1         | 100                      | 377-GVLDIYGFE | 100            | 181-YLLEKSRLV |
|               | 2         | 100                      | 384-GVLDIYGFE | 100            | 188-YLLEKSRVV |
|               | 3         | 100                      | 380-GVLDIYGFE | 100            | 184-YLLEKSRVI |
|               | 4         | 100                      | 392-GVLDIYGFE | 100            | 184-YLLEKSRVL |
|               | 5         | 100                      | 418-GLLDIYGFE | 100            | 220-YLLEKSRVV |
|               | 6         | 100                      | 388-GLLDIYGFE | 100            | 185-YLIEKSRVV |
|               | 7         | 100                      | 385-GVLDIYGFE | 100            | 192-FLLEKSRVV |
|               | 8         | 100                      | 383-GVLDIYGFE | 100            | 190-FLLEKSRVV |
| <b>Domain</b> |           | <b>ATP, S-II</b>         |               | <b>ATP</b>     |               |
