# Supplementary material for: Mathematical Characterization of Protein Sequences Using Patterns as Chemical Group Combinations of Amino Acids
Source: PubMed Central journal article supplement (PMC5145171; doi:10.1371/journal.pone.0167651), 2016-12-08
Supplement: pone.0167651.s004.pdf [file pone.0167651.s004.pdf]

**S4 Table. Common blocks/patterns between MYLK and Rho protein families members.**

| Family | Seq. nos. | Similarity (%) | Patterns                              |                               |                                |
|--------|-----------|----------------|---------------------------------------|-------------------------------|--------------------------------|
|        |           |                | 4244134                               | 142518                        | 475134                         |
| MYLK   | 1         | 100            | 1601-IKLIDFG                          | 1585-DLKPEN                   | 1623-GTPEFV                    |
|        | 2         | 100            | 422-VKIIDFG                           | 406-DLKPEN                    | 444-GTPEFL                     |
|        | 3         | 100            | 652-IKIIDFG                           | 636-DLKPEN                    | 674-GTPEFL                     |
|        | 4         | 100            | 243-IKIIDFG                           | 227-DLKPEN                    | 265-GTPEFL                     |
| Rho    | 1         | 100            | 212-LKLADFG                           | 198-DVKPDN                    | 236-GTPDYI                     |
|        | 2         | 100            | 228-LKLADFG                           | 214-DVKPDN                    | 252-GTPDYI                     |
| Domain |           |                | ATP, starting site of Activation loop | Start of proton acceptor site | Ending site of activation loop |
