# Supplementary material for: Mathematical Characterization of Protein Sequences Using Patterns as Chemical Group Combinations of Amino Acids
Source: PubMed Central journal article supplement (PMC5145171; doi:10.1371/journal.pone.0167651), 2016-12-08
Supplement: pone.0167651.s005.pdf [file pone.0167651.s005.pdf]

S5 Table. Common blocks /patterns among Na<sup>+</sup>-ATPase family members in two groups.

| Seq. Nos.     | Similarity (%) | Pattern                                                                             |
|---------------|----------------|-------------------------------------------------------------------------------------|
|               |                | 341444344444448451444474746474742264228644284144174477774671274747882674426331      |
| 1             | 100            | 317-WLEAVIFLIGIIVANVPEGLLATVTVCLTLTAKRMARKNCLVKNLEAVETLGSTSTICSDDKTGTLTQNRMTVAHMWFD |
| 2             | 100            | 315-WLEAVIFLIGIIVANVPEGLLATVTVCLTLTAKRMARKNCLVKNLEAVETLGSTSTICSDDKTGTLTQNRMTVAHMWFD |
| 3             | 100            | 307-WLEAVIFLIGIIVANVPEGLLATVTVCLTLTAKRMARKNCLVKNLEAVETLGSTSTICSDDKTGTLTQNRMTVAHMWFD |
| 4             | 100            | 325-WLEAVIFLIGIIVANVPEGLLATVTVCLTLTAKRMARKNCLVKNLEAVETLGSTSTICSDDKTGTLTQNRMTVAHMWFD |
| Seq. Nos.     | Similarity (%) | 3353342                                                                             |
| 5             | 100            | 242-YYPYGG                                                                          |
| 6             | 100            | 227-YFPYGG                                                                          |
| 7             | 100            | 214-YFPYGG                                                                          |
| 8             | 100            | 295-YYPYGG                                                                          |
| <b>Domain</b> |                | <b>E1-E2_ATPase</b>                                                                 |
