# Supplementary material for: Mathematical Characterization of Protein Sequences Using Patterns as Chemical Group Combinations of Amino Acids
Source: PubMed Central journal article supplement (PMC5145171; doi:10.1371/journal.pone.0167651), 2016-12-08
Supplement: pone.0167651.s006.pdf [file pone.0167651.s006.pdf]

**S6 Table. Common blocks/patterns among Ca<sup>2+</sup>-ATPase family members**

|   |                       | <b>Patterns</b>        |                            |                     |
|---|-----------------------|------------------------|----------------------------|---------------------|
|   | <b>Similarity (%)</b> | <b>444444514454447</b> | <b>744671274747</b>        | <b>814544224144</b> |
| 1 | 100                   | 302-LAVAAIPEGLPAVIT    | 346-SVICSDKTGTLT           | 706-NDAPALKKAEIG    |
| 2 | 100                   | 302-LAVAAIPEGLPAVIT    | 346-SVICSDKTGTLT           | 705-NDAPALKKAEIG    |
| 3 | 100                   | 302-LAVAAIPEGLPAVIT    | 346-SVICSDKTGTLT           | 706-NDAPALKKAEIG    |
| 4 | 100                   | 426-VLVVAVPEGLPLAVT    | 470-TAICSDKTGTLT           | 800-NDGPALKKADVG    |
| 5 | 100                   | 450-VLVVAVPEGLPLAVT    | 494-TAICSDKTGTLT           | 823-NDGPALKKADVG    |
| 6 | 100                   | 424-VLVVAVPEGLPLAVT    | 468-TAICSDKTGTLT           | 797-NDGPALKKADVG    |
| 7 | 100                   | 416-VLVVAVPEGLPLAVT    | 460-TAICSDKTGTLT           | 788-NDGPALKKADVG    |
|   | <b>Domain</b>         | <b>Transmembrane</b>   | <b>Before E1_E2_ATPase</b> | <b>-</b>            |
