# Supplementary material for: Mathematical Characterization of Protein Sequences Using Patterns as Chemical Group Combinations of Amino Acids
Source: PubMed Central journal article supplement (PMC5145171; doi:10.1371/journal.pone.0167651), 2016-12-08
Supplement: pone.0167651.s007.pdf [file pone.0167651.s007.pdf]

**S7 Table. Two blocks/patterns of length 17 aa and 20 aa and their similarity with non-muscle group and muscle group of myosin II.**

| Seq. nos.     | Similarity (%) | Pattern                  | Similarity (%) | Pattern                                         |
|---------------|----------------|--------------------------|----------------|-------------------------------------------------|
|               |                | 22128718476518744824     |                | 18464837812488338                               |
| 1             | 100            | 381-KRERNTDQATMPDNTAAQKL | 94             | 491-EQLCINYTNEKLQQLFN                           |
| 2             | 100            | 362-KKERNTDQASMPDNTAAQKV | 94             | 472-EQLCINYTNEKLQQLFN                           |
| 3             | 100            | 355-KKERNTDQASMPDNTAAQKV | 94             | 465-EQLCINYTNEKLQQLFN                           |
| 4             | 100            | 362-KKERNTDQASMPENTVAQKL | 94             | 472-EQLCINYTNEKLQQLFN                           |
| 5             | 40             | 201-GKTVNSKHIIQYFATIAAMI | 100            | 486-EQLCINFTNEKLQQFFN                           |
| 6             | 40             | 597-WLEKNKDPLNETVVPIFQKS | 100            | 477-EQLCINFTNEKLQQFFN                           |
| 7             | 40             | 184-GKTVNTRKVIQYFATIAVTG | 100            | 477-EQLCINFTNEKLQQFFN                           |
| 8             | 40             | 184-GKTVNTRKVIQYFATIAVTG | 100            | 477-EQLCINFTNEKLQQFFN                           |
| 9             | 40             | 186-GKTVNTRKVIQYFATIAVTG | 100            | 477-EQLCINFTNEKLQQFFN                           |
| 10            | 40             | 184-GKTVNTRKVIQYFATIAVTG | 100            | 477-EQLCINFTNEKLQQFFN                           |
| 11            | 40             | 184-GKTVNTRKVIQYFATIAATG | 100            | 475-EQLCINFTNEKLQQFFN                           |
| 12            | 40             | 184-GKTVNTRKVIQYFATIAVTG | 100            | 476-EQLCINFTNEKLQQFFN                           |
| 13            | 40             | 206-KKDQSPGKGTLEDQIIQANP | 100            | 474-EQLCINFTNEKLQQFFN                           |
| 14            | 40             | 183-GKTVNTRKVIQYFASIAAIG | 100            | 475-EQLCINFTNEKLQQFFN                           |
| <b>Domain</b> |                | <b>ATP binding site</b>  |                | <b>Nearer to the ending of ATP binding site</b> |
